# Supplementary material for: A Randomized Controlled Trial of a Parent-Led Memory-Reframing Intervention to Reduce Distress and Pain Associated with Vaccine Injections in Young Children
Source: MDPI journal article supplement (doi:10.3390/children10071099), 2023-06-22
Supplement: s1 [file s1]

Figure S1: Evidence-based pain management strategies



**Needle Pain & Anxiety Management for Vaccinations**

### Resources for Children, Parents, and Families



**Parents Canada 1-Page Resource**  
Access here: [tinyurl.com/ddebsvdy](https://tinyurl.com/ddebsvdy)



**Conversation Canada Articles**  
5 simple ways to ease vaccination pain for yourself and your child: [tinyurl.com/cmhzc2](https://tinyurl.com/cmhzc2)  
  
Needle fears can cause COVID-19 vaccine hesitancy, but these strategies can manage pain and fear: [tinyurl.com/23xfpay6](https://tinyurl.com/23xfpay6)



**CARD System: Comfort, Ask, Relax, Distract**  
Access here: [tinyurl.com/2cc82n7j](https://tinyurl.com/2cc82n7j)



**It Doesn't Have to Hurt Video**  
Watch here: [tinyurl.com/2esx7k26](https://tinyurl.com/2esx7k26)  
  
For more [#ItDoesntHaveToHurt](https://www.itdoesnthavetohurt.ca) content: [www.itdoesnthavetohurt.ca](https://www.itdoesnthavetohurt.ca)



**Les stratégies Tout doux**  
Téléchargez ici: [tinyurl.com/hr3aczpw](https://tinyurl.com/hr3aczpw)



**J'aime pas les piqûres !**  
Téléchargez ici: [tinyurl.com/ra8syhmk](https://tinyurl.com/ra8syhmk)



**Meg Foundation**  
Access here: [megfoundationforpain.org](https://megfoundationforpain.org)



**Government of Canada Resources**  
What to expect at your child's vaccination appointment: [tinyurl.com/5enbyvnc](https://tinyurl.com/5enbyvnc)  
  
À quoi s'attendre lors de la visite de vaccination: [tinyurl.com/e49yjbzu](https://tinyurl.com/e49yjbzu)



**Mom Hack Video: When Kids are Afraid of Needles**  
Access here: [tinyurl.com/445k97fe](https://tinyurl.com/445k97fe)



**Anxiety Canada**  
Helping Children with Needle/Vaccine-Related Anxieties: [tinyurl.com/uwatncxk](https://tinyurl.com/uwatncxk)  
  
My Anxiety Pain Plan  
• Children & teens: [tinyurl.com/n6em75kw](https://tinyurl.com/n6em75kw)  
• Adults: [tinyurl.com/yv8pjb8](https://tinyurl.com/yv8pjb8)



**Commitment to Comfort**  
Access here: [tinyurl.com/vancepcb](https://tinyurl.com/vancepcb)



**Be Sweet to Babies Video Series Available in several languages**  
Watch here: [tinyurl.com/ur2e9vf9](https://tinyurl.com/ur2e9vf9)

### Resources for Health Professionals and Adults



**Immunize Canada Resources**  
For clinicians: [tinyurl.com/279vhnvf](https://tinyurl.com/279vhnvf)  
• Children: [tinyurl.com/yacva6bd](https://tinyurl.com/yacva6bd)  
• Youth: [tinyurl.com/362zx5bc](https://tinyurl.com/362zx5bc)  
• Adults: [tinyurl.com/26revw2a](https://tinyurl.com/26revw2a)  
  
La peur des aiguilles et ses répercussions: [tinyurl.com/38c59wky](https://tinyurl.com/38c59wky)



**Clinical Practice Guidelines**  
For needle pain: [tinyurl.com/495jnhk3](https://tinyurl.com/495jnhk3)  
For needle fear: [tinyurl.com/36zksk2b](https://tinyurl.com/36zksk2b)



**Executive Summary/Sommaire Exécutif**  
COVID-19 Vaccine Hesitancy and Needle Fear Survey: [tinyurl.com/3fja3vxj](https://tinyurl.com/3fja3vxj)  
Enquête sur la réticence à la vaccination contre la COVID-19 et la peur des injections: [tinyurl.com/z6eerzau](https://tinyurl.com/z6eerzau)

kidsinpain.co #ItDoesntHaveToHurt @kidsinpain

Figure S2: Memory-reframing intervention handout

## THE SIMPLE ACT OF **TALKING** IN A SPECIAL WAY TO YOUR CHILD **CAN CHANGE** HOW THEY REMEMBER **PAIN**



Pain isn't over when it's over. Our memories of pain stay with us into adulthood. **But there is good news.** Scientific research tells us that we can **shape pain memories to be more positive.**

By choosing to talk about a painful experience in a positive way, you can change your child's memory of it to be more positive too.

**How?** Use this powerful combination:

**USE  
POSITIVE  
TALK**

Don't talk about pain or scary feelings. Focus on the positive.



"Someone helped you, the nurse was so nice."  
"You rolled up your sleeve, turned on your video, and it was over really quickly!"

**KEEP  
IT  
REAL**

Catch exaggerations and remind your child what really happened.



"I cried for so long!"  
"Yes, you cried, but only for a few minutes, remember? Because then we got ice cream!"

**BUILD  
THEM  
UP**

Tell your child that they were brave, and why. Celebrate.



"You were so brave, I'm proud of you!"  
"You took deep breaths and distracted yourself with your video. You knew what to do!"

**The benefits?**

**You are empowered.**

Research tells us that your child will be less scared and have less pain the next time.

**You empower your child.**

You teach your child better ways to remember and manage painful experiences.

**Their future looks brighter.**

Research tells us benefits are long lasting, helping your child to better manage pain as an adult!



We are Champions for Kids' Pain. Our team is driven, clever and focused. Our research is actively pursuing better ways to understand, diagnose, manage, reduce, and treat pain. We incorporate research and collaboration for better understanding and better solutions for kids and families living with pain, now.

Visit us for more! [PEAKResearchLab.ca/memory](https://PEAKResearchLab.ca/memory)

#TalkingCanChangePain

Table S1: Parent Adherence Checklist

| Question                                                                                                | Answer Options                                                                                                                                                                                                                                                                                                                                                                                                                                                                           |
|---------------------------------------------------------------------------------------------------------|------------------------------------------------------------------------------------------------------------------------------------------------------------------------------------------------------------------------------------------------------------------------------------------------------------------------------------------------------------------------------------------------------------------------------------------------------------------------------------------|
| 1. Before or during the first COVID shot, which of these strategies did you use (check all that apply)  | <ul style="list-style-type: none"> <li>• Created a Comfort Plan for my child</li> <li>• Talked about the upcoming COVID shot</li> <li>• Used numbing creams and patches</li> <li>• Practiced relaxation techniques (e.g., deep breathing)</li> <li>• Used neutral language rather than drawing attention to pain</li> <li>• Avoided reassuring my child (e.g., don't say "It will be over soon" or "You are fine")</li> <li>• Distracted my child (e.g., with a video, music)</li> </ul> |
| 2. After the first COVID shot, which of these strategies did you use (check all that apply)             | <ul style="list-style-type: none"> <li>• Talked about positive things that happened before/during /after the shot</li> <li>• Tried to avoid using pain language (e.g., saying hurt, pain, stab)</li> <li>• Caught any exaggerations regarding needle pain and/or fear and reminded my child what really happened</li> <li>• Told my child they were brave</li> <li>• Talked about what helped to deal with needle pain and/or fear</li> </ul>                                            |
| 3. Before or during the second COVID shot, which of these strategies did you use (check all that apply) | <ul style="list-style-type: none"> <li>• Created a Comfort Plan for my child</li> <li>• Talked about the upcoming COVID shot</li> <li>• Used numbing creams and patches</li> <li>• Practiced relaxation techniques (e.g., deep breathing)</li> <li>• Used neutral language rather than drawing attention to pain</li> <li>• Avoided reassuring my child (e.g., don't say "It will be over soon" or "You are fine")</li> <li>• Distracted my child (e.g., with a video, music)</li> </ul> |
| 4. After the second COVID shot, which of these strategies did you use (check all that apply)            | <ul style="list-style-type: none"> <li>• Talked about positive things that happened before/during /after the shot</li> <li>• Tried to avoid using pain language (e.g., saying hurt, pain, stab)</li> <li>• Caught any exaggerations regarding needle pain and/or fear and reminded my child what really happened</li> <li>• Told my child they were brave</li> <li>• Talked about what helped to deal with needle pain and/or fear</li> </ul>                                            |
